# Supplementary material for: The Macroalgal Biostimulant Improves the Functional Quality of Tomato Fruits Produced from Plants Grown under Salt Stress
Source: MDPI journal article supplement (doi:10.3390/agriculture13010006), 2022-12-20

Figure S2. Compounds identified through GCMS in pericarp of tomatoes emerged out of T0 and T1

**Antioxidant compounds**

2-Ethylacridine

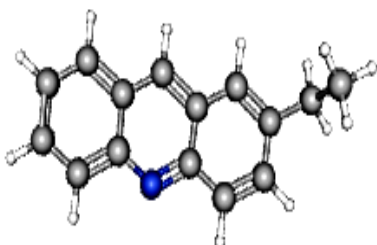

4H-Pyran-4-one, 2, 3-dihydro-3,5-

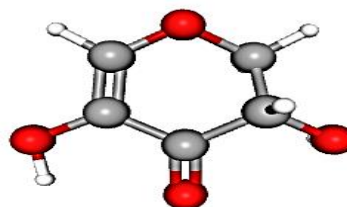

---

**Alkanes**

Octasiloxane

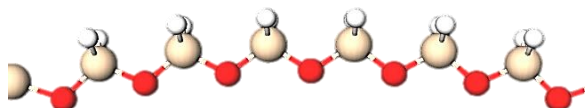

**Alkanes**

Cyclotrisiloxane, hexamethyl

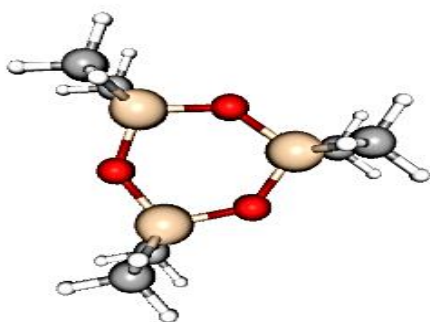

Methyltris(trimethylsiloxy)silane

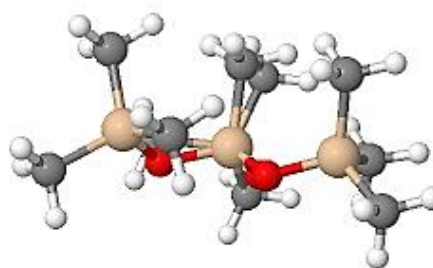

**Phenolic compounds**

Ethylene glycol phenyl ether methacrylate

1H-Indole, 1-methyl-2-phenyl

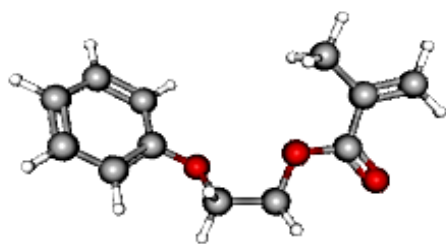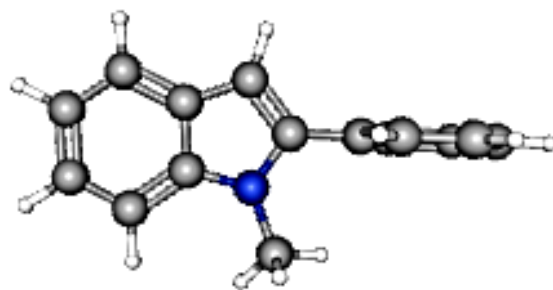

Fatty acid

Benzo[h]quinoline, 2,4-dimethyl

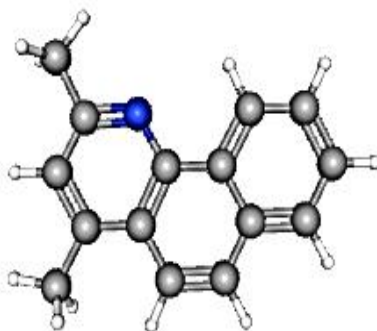

**Indole acetic acid derivative**

1H-Indole, 1-methyl-2-phenyl-

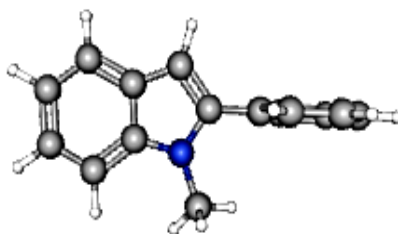

Supplement: s1 [file s1]
