# Supplementary figures and images for: The Macroalgal Biostimulant Improves the Functional Quality of Tomato Fruits Produced from Plants Grown under Salt Stress
Source: MDPI journal article supplement (doi:10.3390/agriculture13010006), 2022-12-20

Figure S1. GCMS spectrum of pericarp of tomatoes emerged out of A) T0 B) T5 and C) T7

A)

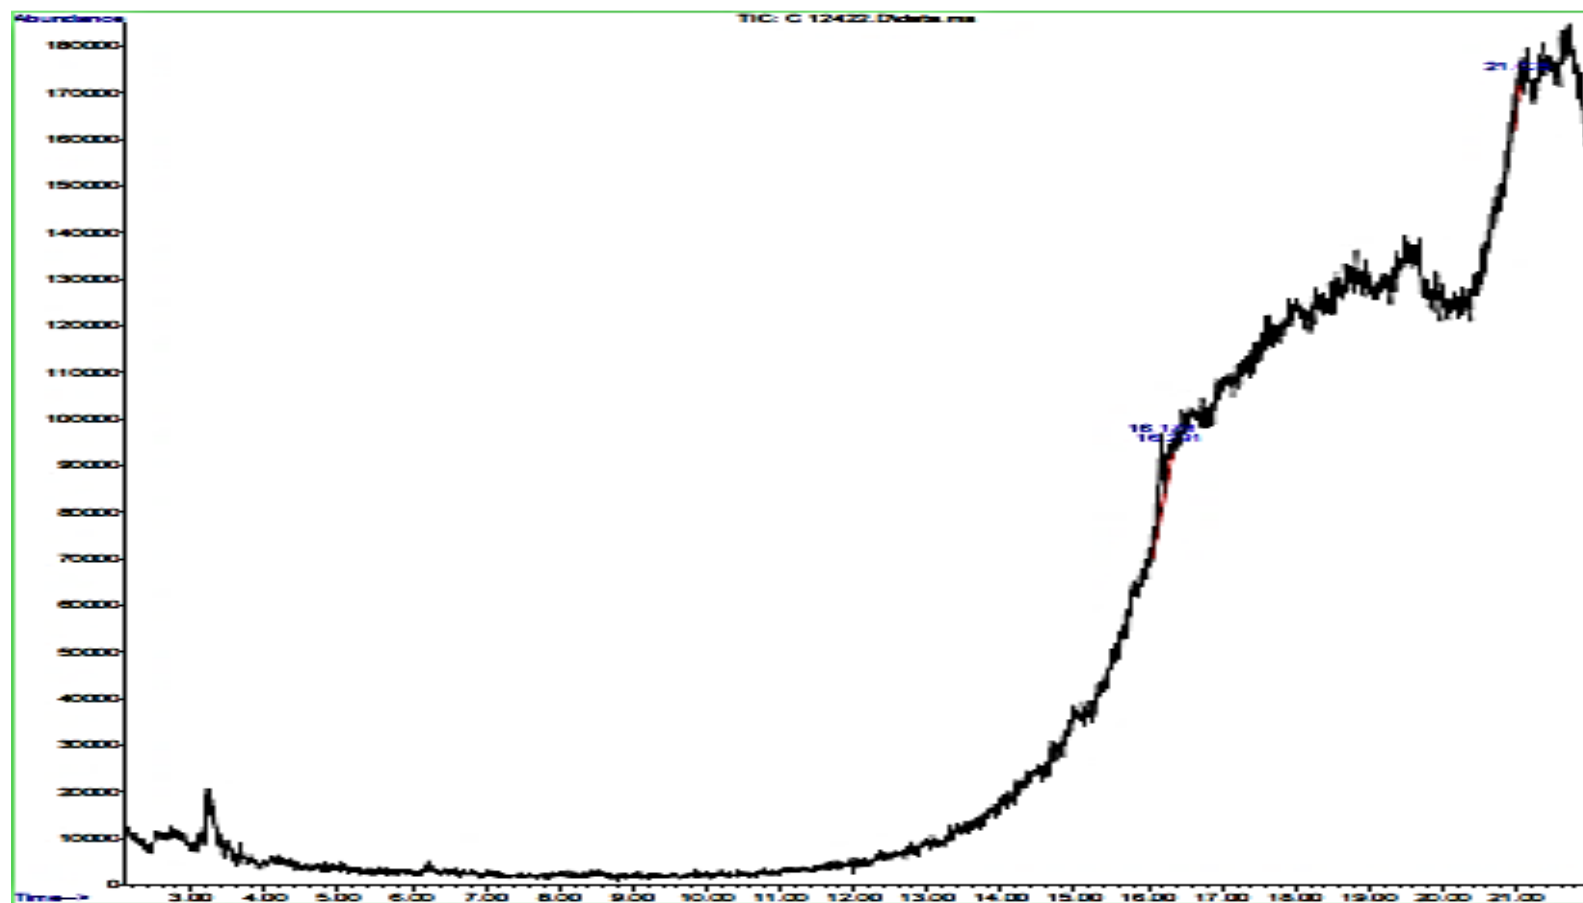

B)

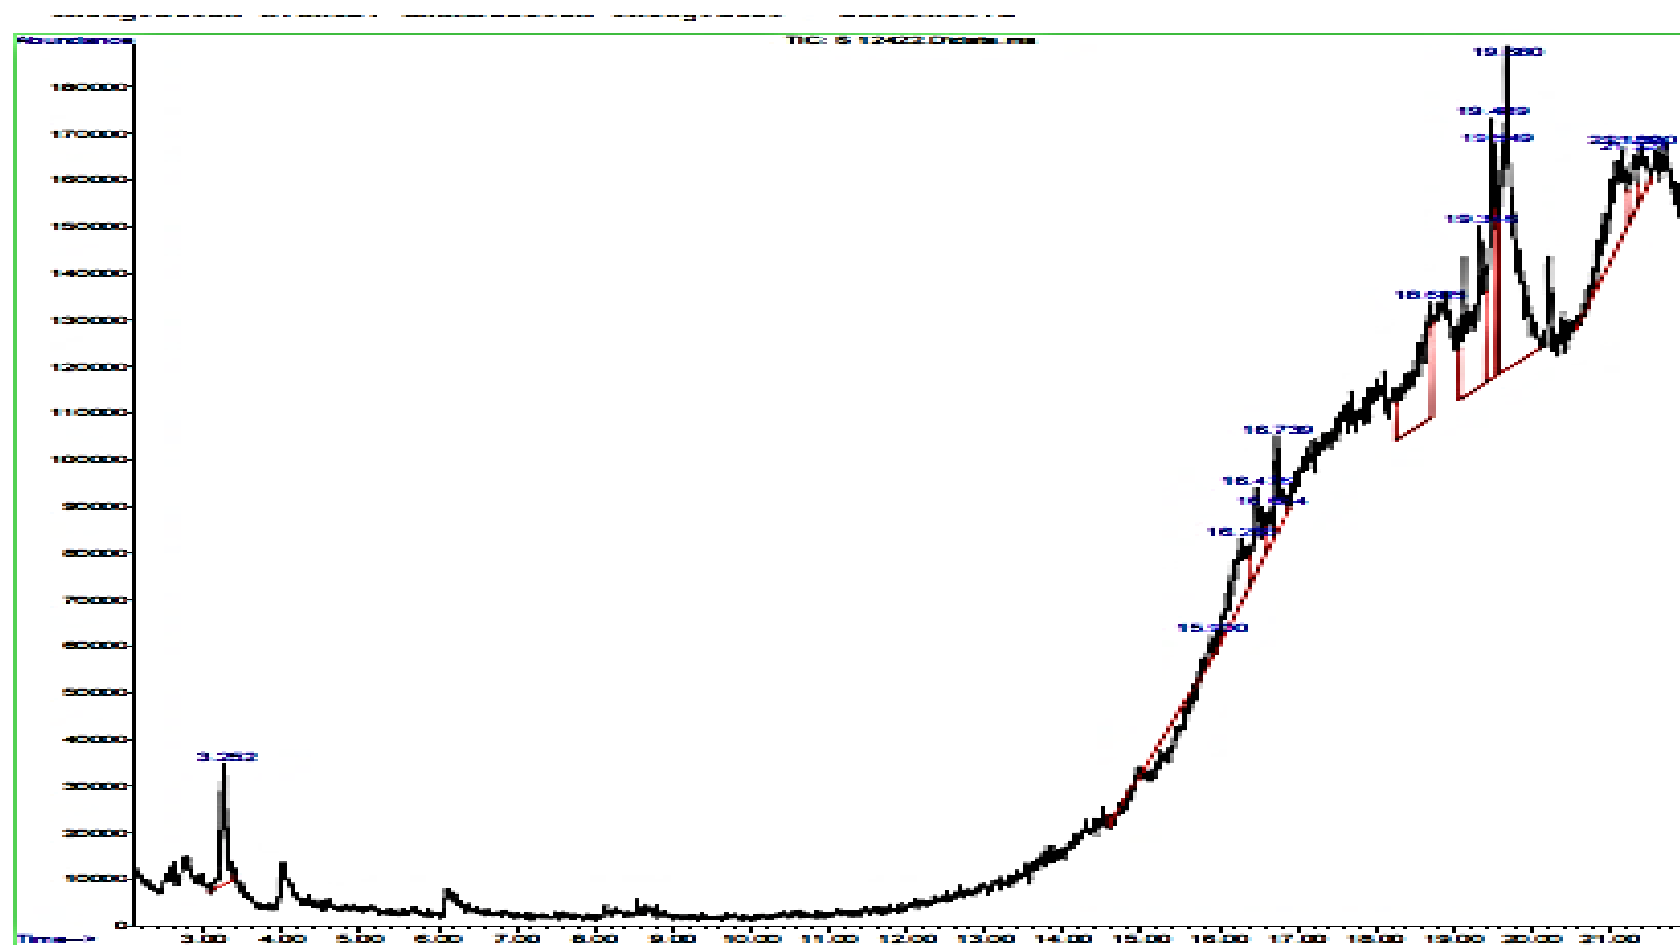

C)

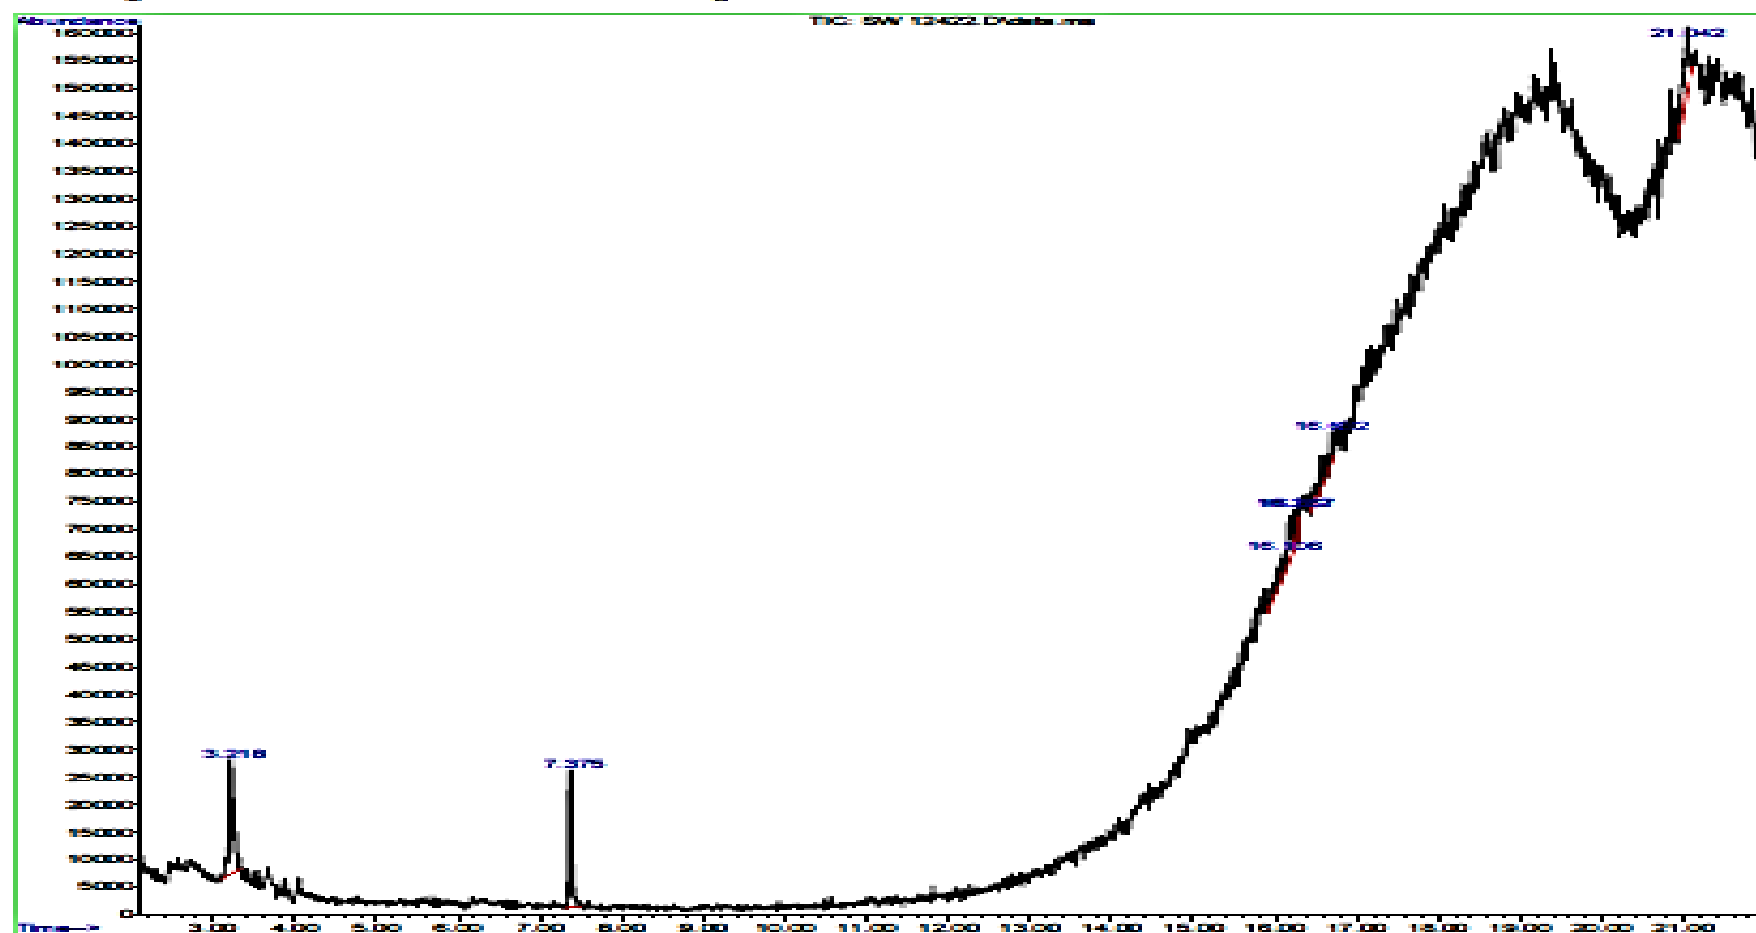

Supplement: s1 [file s1]
